# Supplementary material for: Comparative Studies of Selected Criteria Enabling Optimization of the Extraction of Polar Biologically Active Compounds from Alfalfa with Supercritical Carbon Dioxide
Source: MDPI journal article supplement (doi:10.3390/molecules26102994), 2021-05-18

**Table S1.** Specific HPLC-MS/MS results for lucerne extracts, where quantities as express as  $\mu\text{g } 100\text{g}^{-1}$  DW (DW – dry weight of the feedstock; 200 g).

| compounds             | number of extraction experiments |        |       |       |       |       |       |       |       |       |       |       |       |       |        |
|-----------------------|----------------------------------|--------|-------|-------|-------|-------|-------|-------|-------|-------|-------|-------|-------|-------|--------|
|                       | E1                               | E2     | E3    | E4    | E5    | E6    | E7    | E8    | E9    | E10   | E11   | E12   | E13   | E14   | E15    |
| coumaric acid         | 2.99                             | 1.97   | 0.32  | 2.61  | 1.35  | 1.21  | 1.19  | 1.35  | 1.32  | 0.59  | 2.13  | 1.25  | 0.93  | 0.23  | 2.04   |
| salicylic acid        | 51.59                            | 112.85 | 27.40 | 43.93 | 32.24 | 42.42 | 33.19 | 1.00  | 48.44 | 21.54 | 29.25 | 45.67 | 59.78 | 22.51 | 110.71 |
| caffeic acid          | 0.39                             | 0.49   | 0.21  | 0.18  | 0.29  | 0.24  | 0.30  | 0.31  | 0.19  | 0.14  | 0.08  | 0.13  | 0.30  | 0.13  | 0.62   |
| syringic acid         | 4.82                             | 3.41   | 1.67  | 4.07  | 2.54  | 2.78  | 2.49  | 2.59  | 3.90  | 2.25  | 2.30  | 2.50  | 3.42  | 1.17  | 3.38   |
| ferulic acid          | 54.37                            | 50.93  | 13.45 | 59.87 | 34.52 | 37.06 | 39.45 | 37.82 | 58.88 | 16.05 | 36.96 | 39.35 | 59.80 | 17.30 | 43.88  |
| protocatechuic acid   | 0.16                             | 0.15   | 0.10  | 0.15  | 0.13  | 0.11  | 0.12  | 0.13  | 0.12  | 0.09  | 0.06  | 0.05  | 0.13  | 0.04  | 0.22   |
| sinapic acid          | 0.66                             | 0.64   | 0.12  | 0.76  | 0.48  | 0.43  | 0.50  | 0.48  | 0.53  | 0.13  | 0.14  | 0.17  | 0.81  | 0.12  | 0.40   |
| 4-hydroxybenzoic acid | 0.43                             | 0.49   | 1.18  | 0.59  | 0.93  | 0.56  | 0.97  | 1.01  | 1.58  | 0.26  | n.d.  | n.d.  | n.d.  | 0.12  | 0.18   |
| biochanin A           | 0.17                             | 0.06   | 0.02  | 0.05  | 0.08  | 0.04  | 0.08  | 0.08  | 0.07  | 0.03  | 0.03  | 0.08  | 0.23  | 0.04  | 0.10   |
| esculetin             | 0.11                             | 0.06   | 0.04  | 0.04  | 0.06  | 0.04  | 0.05  | 0.06  | 0.07  | 0.05  | 0.02  | 0.02  | 0.03  | 0.04  | 0.08   |
| esculin               | 0.01                             | n.d.   | n.d.  | n.d.  | 0.01  | n.d.  | 0.01  | 0.01  | 0.01  | n.d.  | 0.01  | 0.01  | 0.01  | n.d.  | n.d.   |
| naringenin            | 0.14                             | 0.09   | 0.02  | 0.05  | 0.08  | 0.07  | 0.09  | 0.09  | 0.08  | 0.04  | 0.01  | 0.06  | 0.12  | 0.02  | 0.13   |
| naringin              | 0.01                             | 0.01   | n.d.  | 0.01  | 0.01  | 0.01  | 0.01  | 0.01  | 0.01  | 0.01  | n.d.  | n.d.  | 0.01  | n.d.  | 0.01   |
| quercetin             | 1.02                             | 0.43   | 0.14  | 0.48  | 0.28  | 0.37  | 0.28  | 0.30  | 0.37  | 0.16  | 0.33  | 0.34  | 1.12  | 0.20  | 0.68   |
| rutin                 | n.d.                             | n.d.   | n.d.  | 0.01  | 0.01  | n.d.  | 0.01  | 0.01  | n.d.  | n.d.  | n.d.  | n.d.  | 0.01  | n.d.  | n.d.   |
| luteolin              | 0.07                             | 0.09   | n.d.  | 0.01  | 0.03  | 0.04  | 0.03  | 0.03  | 0.05  | n.d.  | n.d.  | 0.01  | 0.07  | n.d.  | 0.06   |
| apigenin              | 1.30                             | 0.61   | 0.04  | 0.01  | 0.23  | 0.49  | 0.28  | 0.25  | 0.79  | 0.24  | n.d.  | 0.45  | 1.10  | 0.11  | 0.67   |

**Table S2.** Response surface plots for the most concentrated polar bioactive compounds in lucerne extracts as a function of main process parameters.

|                                    | Response surface plot as a function of: pressure (P) and temperature (T)          | Response surface plot as a function of: solvent flow rate (F) and temperature (T)  | Response surface plot as a function of: pressure (P) and solvent flow rate (F)      |
|------------------------------------|-----------------------------------------------------------------------------------|------------------------------------------------------------------------------------|-------------------------------------------------------------------------------------|
| Ferulic acid, $\mu\text{g g}^{-1}$ | 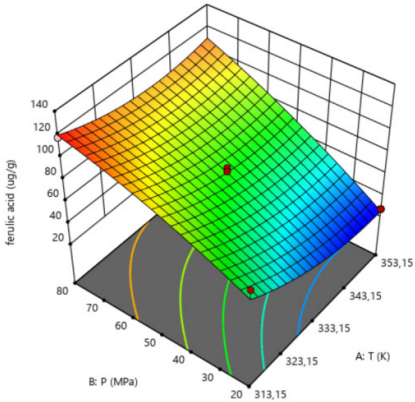 |  |  |

Salicylic acid,  $\mu\text{g g}^{-1}$

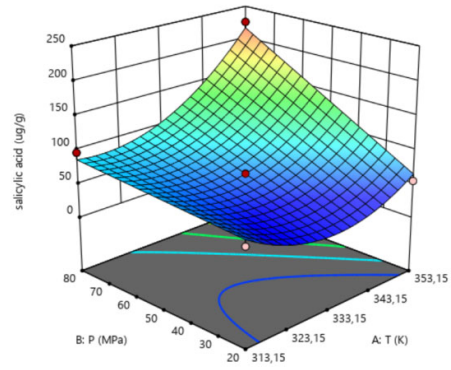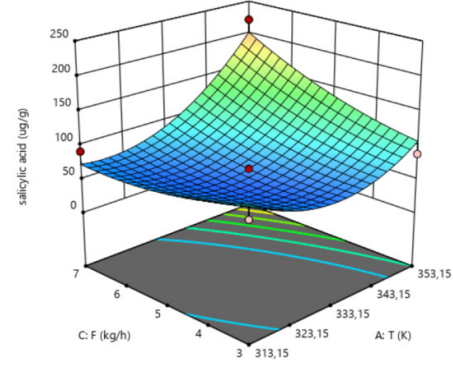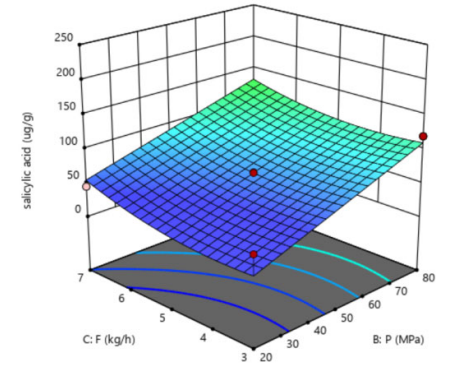

Quercetin,  $\mu\text{g g}^{-1}$

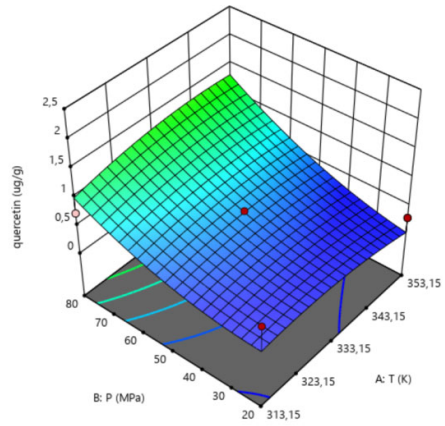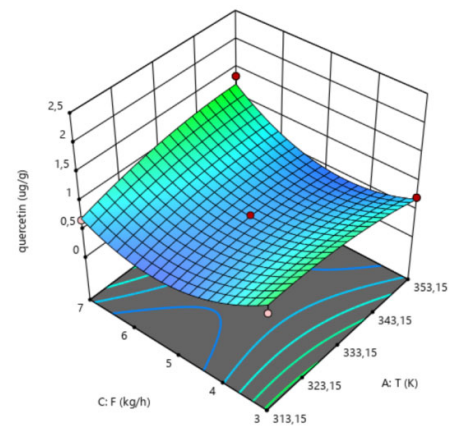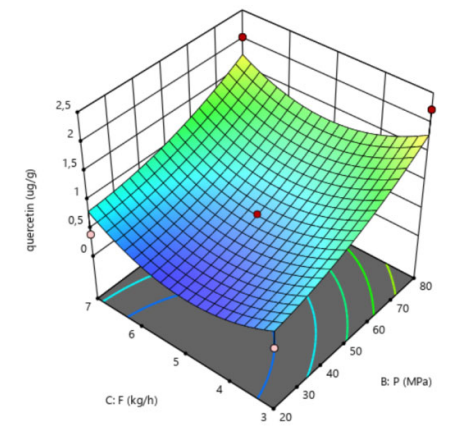

# Apigenin, $\mu\text{g g}^{-1}$

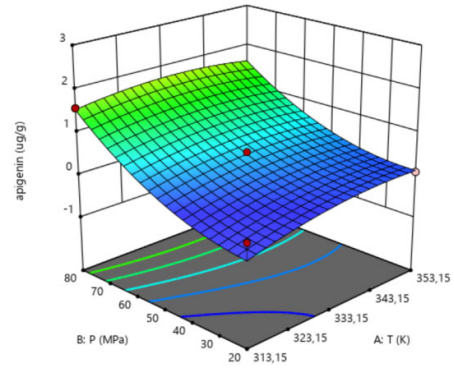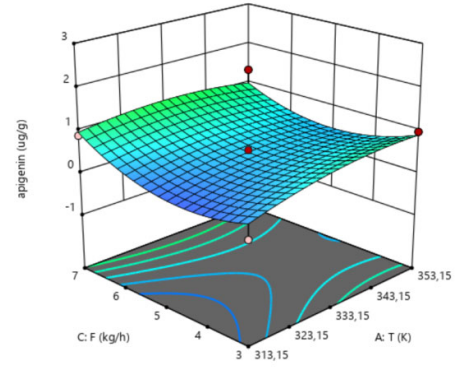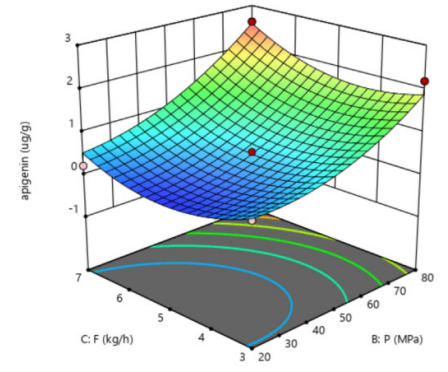

Supplement: s1 [file s1]
